# Supplementary material for: Quantitative comparison of the mRNA content of human iPSC‐derived motor neurons and their extracellular vesicles
Source: PubMed Central journal article supplement (PMC7876496; doi:10.1002/2211-5463.13059), 2021-02-02

# Supplementary Figure S1

(A)

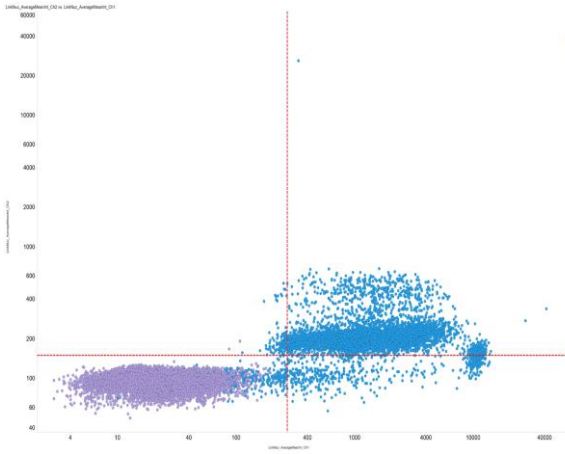

(B)

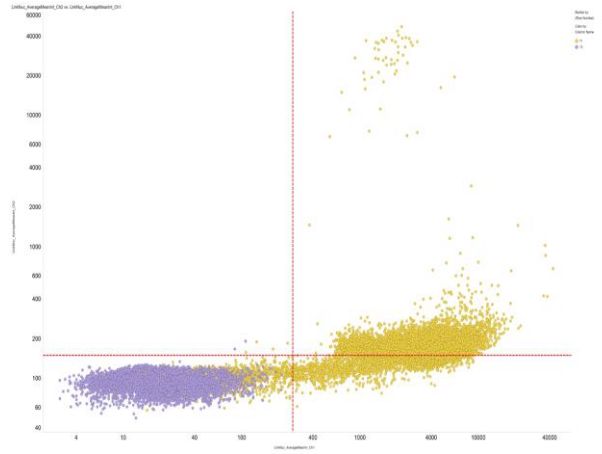

(C)

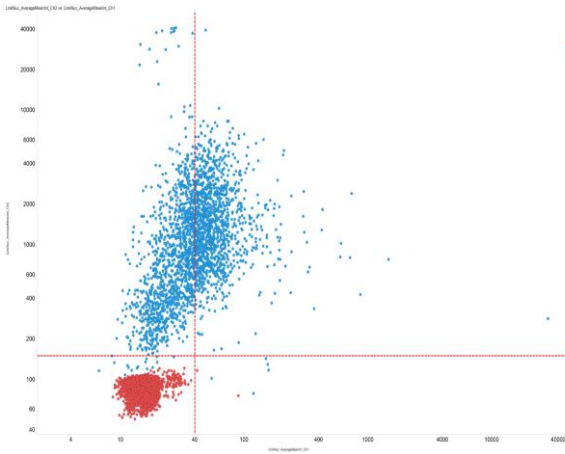

Supplement: FEB4-11-494-s001.pdf [file FEB4-11-494-s001.pdf]
